# Supplementary material
Source: PubMed Central journal article supplement (PMC8127496)
Supplement: 41573_2021_195_MOESM1_ESM.pdf [file 41573_2021_195_MOESM1_ESM.pdf]

---

**Supplementary information**

---

**Kinase drug discovery 20 years after  
imatinib: progress and future directions**

---

In the format provided by the  
authors and unedited

**Table S1. The 76 clinically approved kinase inhibitors up to March 2021.**

Drugs for cancer and other diseases are marked in blue and red, respectively. Tyrosine specific protein kinases (Y) are highted in red, serine/threonine-specific kinases (S/T) in blue, and phosphatidylinositol 3-kinases (PI-3Ks) in black. Where inhibitors have multiple approvals, only the date of the first approval is given. \*Rapamycin derivatives. \*\* approved in Korea; \*\*\* approved in China

| Year | Drug         | Brand Name    | Disease<br>(cancers, others) | Target Kinase<br>(Y,S/T,PI-3K) |
|------|--------------|---------------|------------------------------|--------------------------------|
| 1995 | HA1077       | Fasudil       | cerebral vasospasm           | ROCK1/2                        |
| 1999 | Sirolimus    | Rapamycin     | organ transplantation        | mTOR                           |
| 2001 | Imatinib     | Gleevec       | CML, GIST                    | Abl,c-KIT, PDGFR               |
| 2002 | Gefitinib    | Iressa        | lung                         | EGFR                           |
| 2004 | Erlotinib    | Tarceva       | lung, pancreatic             | EGFR                           |
| 2005 | Sorafenib    | Nexavar       | renal carcinoma, HCC         | multi-targeted                 |
| 2006 | Sunitinib    | Sutent        | renal carcinoma              | multi-targeted                 |
| 2007 | Lapatinib    | Tyverb        | breast                       | EGFR, HER2                     |
| 2007 | Dasatinib    | Sprycel       | CML, ALL                     | Abl, others                    |
| 2007 | Nilotinib    | Tasigna       | CML                          | Abl, others                    |
| 2009 | Rapamycin*   | Everolimus    | kidney transplantation       | TOR                            |
| 2009 | Rapamycin*   | Temsirolimus  | kidney transplantation       | TOR                            |
| 2009 | Pazopanib    | Votrient      | renal carcinoma              | VEGFR, others                  |
| 2011 | Crizotinib   | Xalkori       | lung                         | ALK, ROS1                      |
| 2011 | Vandetanib   | Caprelsa      | thyroid                      | VEGFR, EGFR                    |
| 2011 | Ruxolitinib  | Jakavi        | myelofibrosis                | JAKs                           |
| 2011 | Vemurafenib  | Zelboraf      | malignant melanoma           | BRAF[V600E]                    |
| 2011 | Axitinib     | Inlyta        | renal carcinoma              | VEGFR, PDGFR                   |
| 2011 | Icotinib***  | Conmana       | lung                         | EGFR                           |
| 2012 | Regorafenib  | Stiverga      | colorectal, others           | VEGFR2, TIE2                   |
| 2012 | Tofacitinib  | Xeljanz       | rheumatoid arthritis         | JAKs                           |
| 2012 | Cabozantinib | Cabometyx     | medullary thyroid            | MET, others                    |
| 2012 | Ponatinib    | Iclusig       | CML, ALL                     | Abl, others                    |
| 2012 | Bosutinib    | Bosulif       | CML                          | Abl, others                    |
| 2012 | Radotinib**  | Supect        | CML                          | Abl, others                    |
| 2013 | Dabrafenib   | Tafinlar      | melanoma                     | BRAF[V600E]                    |
| 2013 | Trametinib   | Mekinist      | melanoma                     | MEK1/MEK2                      |
| 2013 | Afatinib     | Giotrif       | lung                         | EGFR                           |
| 2013 | Ibrutinib    | Imbruvica     | lymphoma, ALL                | BTK                            |
| 2014 | Ripasudil    | Glanatec      | glaucoma,                    | ROCK1/2                        |
| 2014 | Ceritinib    | Zykadia       | lung                         | ALK                            |
| 2014 | Idelalisib   | Zydelig       | CLL                          | PI-3K $\delta$                 |
| 2014 | Nintedanib   | Ofev,Vargatef | lung fibrosis                | multi-targeted                 |
| 2014 | Alectinib    | Alecensa      | lung                         | ALK                            |
| 2015 | Palbociclib  | Ibrance       | advanced breast              | CDK4/CDK6                      |
| 2015 | Lenvatinib   | Lenvima       | thyroid and kidney           | VEGFR                          |
| 2015 | Cobimetinib  | Cotellic      | melanoma                     | MEK1/2                         |

|      |               |           |                             |                      |
|------|---------------|-----------|-----------------------------|----------------------|
| 2015 | Osimetinib    | Tagrisso  | lung                        | mutant EGFR          |
| 2016 | Olmotinib     | Olita     | lung                        | mutant EGFR          |
| 2017 | Ribociclib    | Kisqali   | advanced breast             | CDK4/CDK6            |
| 2017 | Brigatinib    | Akunbrig  | lung cancer                 | EGFR, ALK            |
| 2017 | Midostaurin   | Rydapt    | AML, mastocytosis           | multi-targeted       |
| 2017 | Neratinib     | Nerlynx   | breast                      | HER2                 |
| 2017 | Baricitinib   | Olumiant  | rheumatoid arthritis        | JAKs                 |
| 2017 | Abernaciclib  | Verzenio  | advanced breast             | CDK4/CDK6            |
| 2017 | Copanlisib    | Aliqopa   | follicular lymphoma         | TOR/PI-3K $\delta$   |
| 2017 | Netarsudil    | Rocklatan | glaucoma                    | ROCK1/2              |
| 2017 | Acalabrutinib | Calquence | mantle cell lymphoma        | BTK                  |
| 2018 | Fostamatinib  | Tavalisse | thrombocytopenia            | multi-targeted       |
| 2018 | Anlotinib***  | None      | lung                        | EGFR                 |
| 2018 | Encorafenib   | Braftovi  | melanoma                    | RAF[V600E]           |
| 2018 | Binimetinib   | Mektovi   | melanoma                    | MEK1/2               |
| 2018 | Duvelisib     | Copictra  | CLL, SLL                    | PI3K $\gamma/\delta$ |
| 2018 | Dacomitinib   | Vizimpro  | lung                        | EGFR                 |
| 2018 | Gilteritinib  | Xospata   | AML                         | mutant FLT3          |
| 2018 | Larotrectinib | Vitrakvi  | NTRK fusions                | TRK                  |
| 2018 | Lorlatinib    | Lorviqua  | lung                        | ALK/ROS1             |
| 2019 | Erdafitinib   | Balversa  | bladder                     | FGFR1-4              |
| 2019 | Apelisib      | Piqray    | breast                      | PI3K $\alpha$        |
| 2019 | Pexidartinib  | Turalio   | TGCT (joint tumours)        | CSF1R, KIT, FLT3     |
| 2019 | Entrectinib   | Rozlytrek | NTRK                        | ROS1/ALK/TRK         |
| 2019 | Upadacitinib  | Rinvok    | rheumatoid arthritis        | JAKs                 |
| 2019 | Tepotinib     | Tepmetko  | lung                        | MET                  |
| 2019 | Fedratinib    | Inrebic   | myelofibrosis (bone marrow) | JAK2                 |
| 2019 | Umbralisib    | None      | marginal zone lymphoma      | PI3K $\delta$        |
| 2019 | Zanubrutinib  | Brukinsa  | mantle cell lymphoma        | BTK                  |
| 2020 | Avapritinib   | Ayvakit   | GIST                        | mutant PDGFR         |
| 2020 | Tucatinib     | Tukyssa   | breast                      | HER2                 |
| 2020 | Pemigatinib   | Pemazyre  | cholangiocarcinoma          | FGFR                 |
| 2020 | Capmatinib    | Tabrecta  | lung caused by MET mutation | MET                  |
| 2020 | Selpercatinib | Retevmo   | lung and thyroid            | RET                  |
| 2020 | Pralsetinib.  | Gavreto   | lung and thyroid            | RET                  |
| 2020 | Ripretinib    | Qinlock   | GIST and mastocytosis       | KIT, PDGFR $\alpha$  |
| 2020 | Selumitinib   | Koselugo  | neurofibromatosis type I    | MEK1/2               |
| 2021 | Tivozanib     | Fotivda   | renal cell carcinoma        | VEGFR                |
| 2021 | Trilaciclib   | Cosela    | lung cancer                 | CDK4/CDK6            |
